# Supplementary material for: Similar polymorphism of derivatives of salicylideneanilines with varying halo-substitution
Source: Royal Society of Chemistry journal article supplement (doi:10.1039/d5ce00057b), 2025-01-01
Supplement: d5ce00057b1.pdf [file d5ce00057b1.pdf]

## Supporting Information

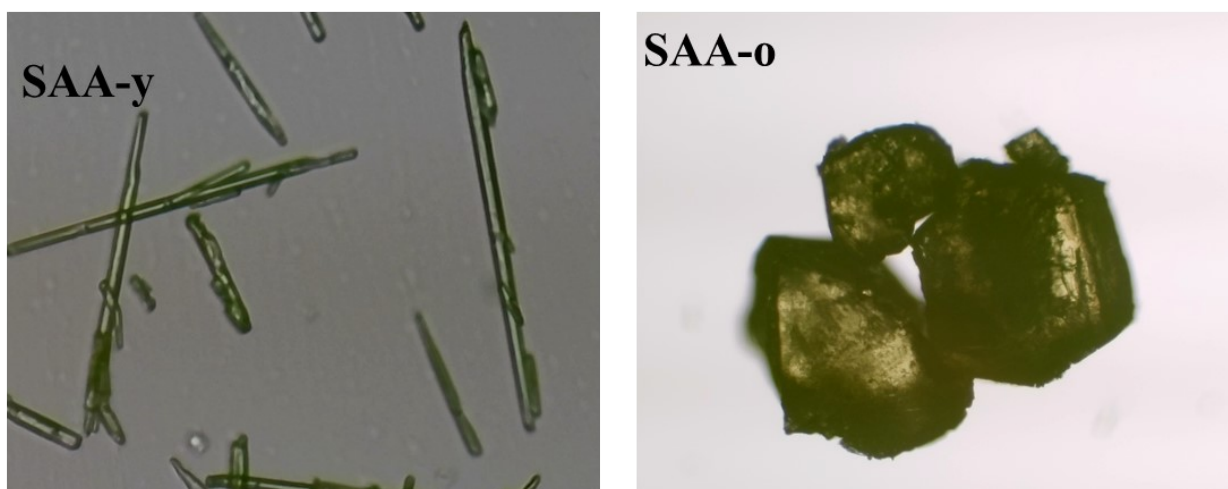

**Figure S1** Crystals of two forms of SAA obtained from methane.

**Table S1** Crystallographic data for the SAA.

|                    | SAA-y        | SAA-o      |
|--------------------|--------------|------------|
| space group        | $P2_12_12_1$ | $Pbc2_1$   |
| a / Å              | 6.075(11)    | 5.794(<1)  |
| b / Å              | 11.631(15)   | 13.018(1)  |
| c / Å              | 14.484(2)    | 13.617(1)  |
| $\beta$ / °        | 90           | 90         |
| V / Å <sup>3</sup> | 1023.38      | 1027.1(18) |
| D <sub>calcd</sub> | 1.28         | 1.275      |
| Z                  | 4            | 4          |
| T / K              | 120          | 120(2)     |
| R                  | 4.1          | 4.26       |
| R <sub>w</sub>     | 9.5          | 10.18      |

**Figure S2** Molecular arrangement in crystals of SAA-y (top) and SAA-o (bottom).

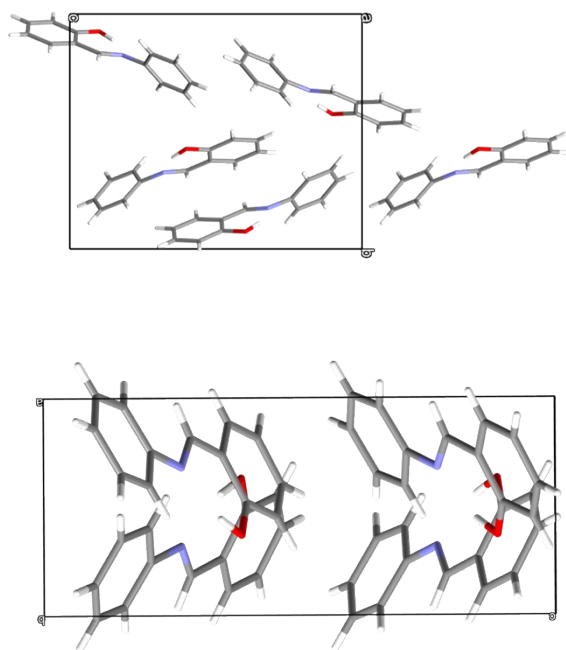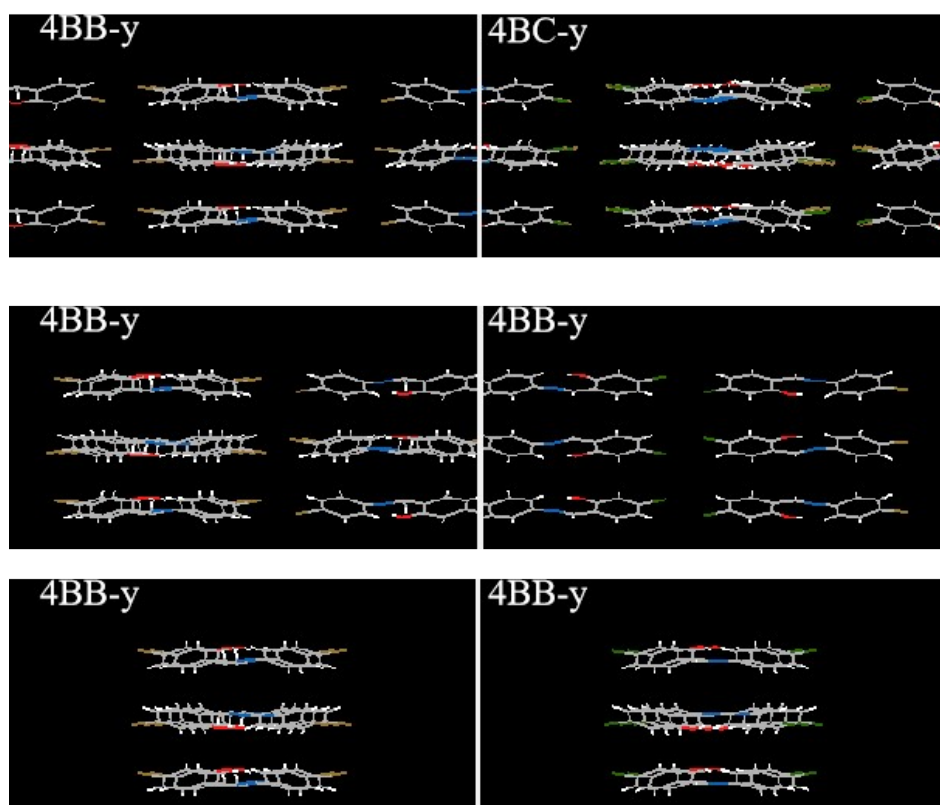

**Figure S3** Matching structures of comparison between derivatives and 4BB-y in XPac

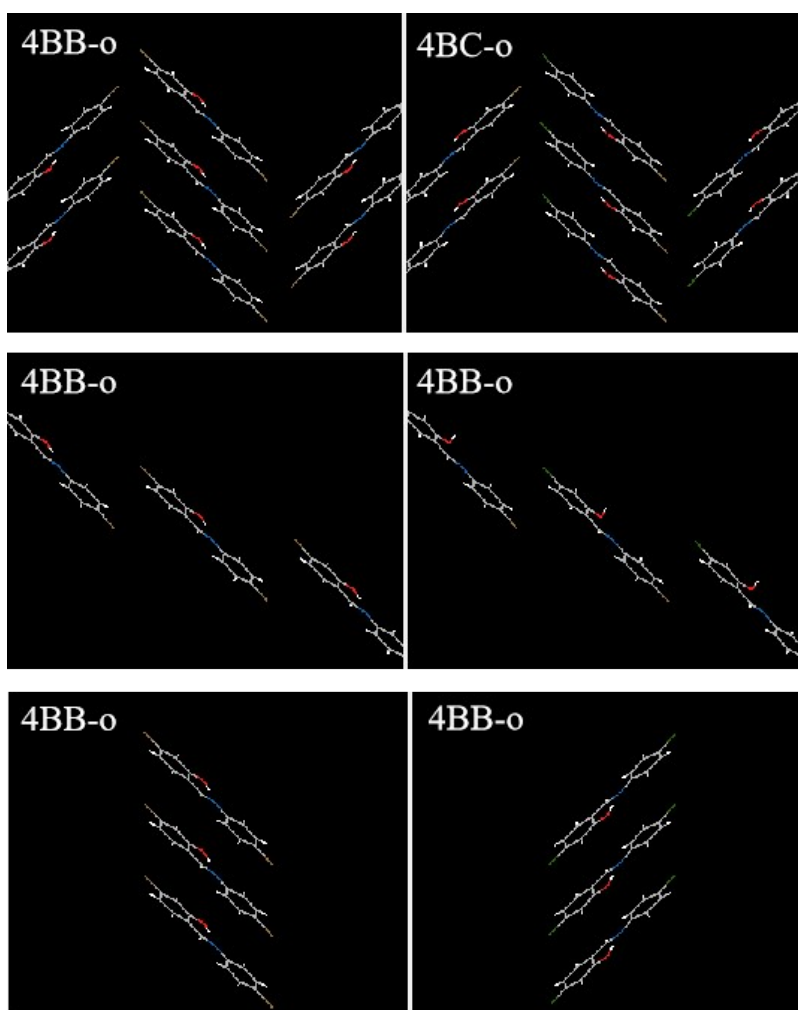

**Figure S4** Matching structures of comparison between derivatives and 4BB-o in XPac

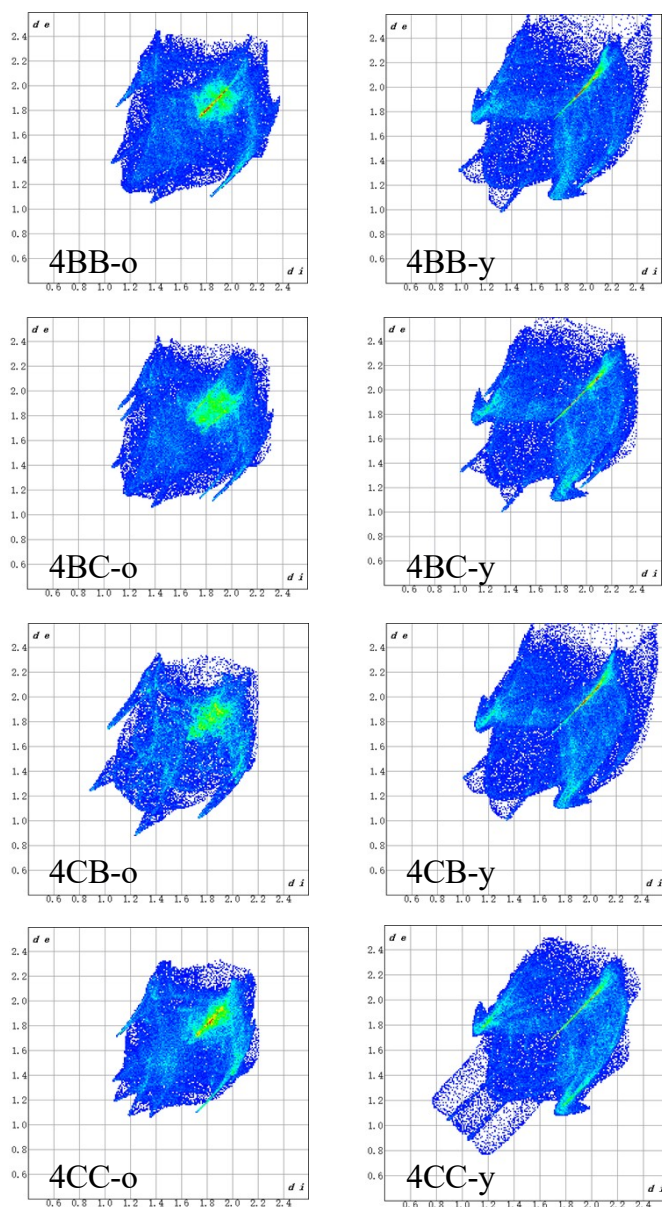

**Figure S5** Crystal fingerprint plots for the four salicylideneanilines derivatives.

**Table S2**  $H/J$  g<sup>-1</sup> during heating and cooling process.

|           | Heating process | Cooling process |
|-----------|-----------------|-----------------|
| 4BC-y     |                 |                 |
| 1st cycle | 82.991          | 80.991          |
| 2nd cycle | 81.604          | 78.971          |
| 4BC-o     |                 |                 |
| 1st cycle | 84.366          | 81.069          |
| 2nd cycle | 81.163          | 77.835          |
| 4CC-y     |                 |                 |

|           |        |        |
|-----------|--------|--------|
| 1st cycle | 95.841 | 85.591 |
| 2nd cycle | 85.808 | 84.435 |
| <hr/>     |        |        |
| 4CC-o     |        |        |
| 1st cycle | 89.939 | 79.557 |
| 2nd cycle | 77.589 | 76.889 |

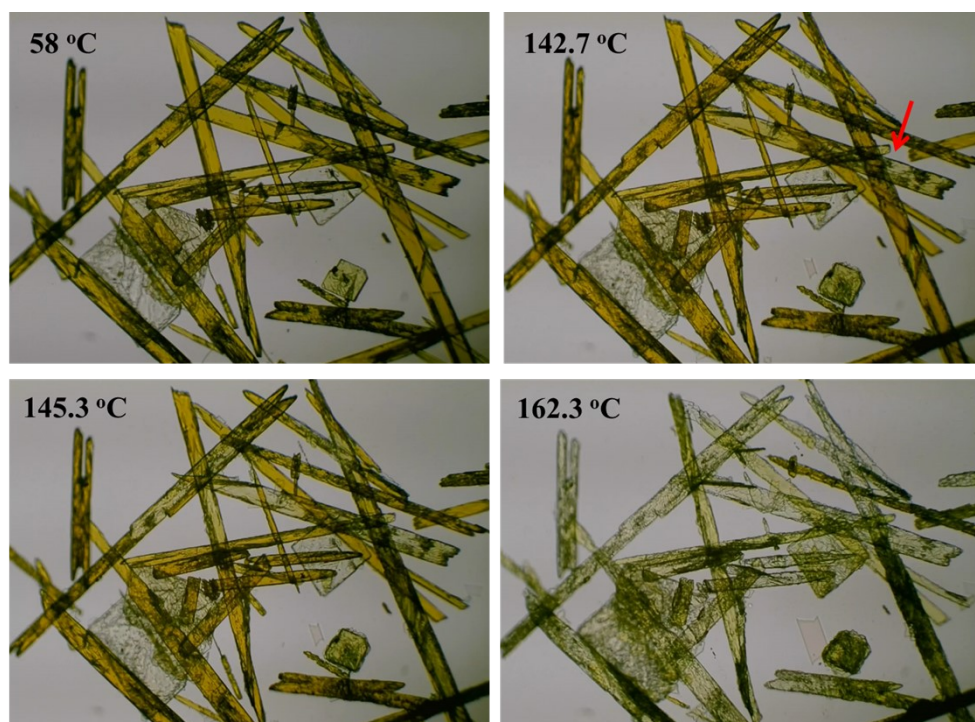

**Figure S6** Snapshots of 4CB crystals morphology changes in solid state during heating process.

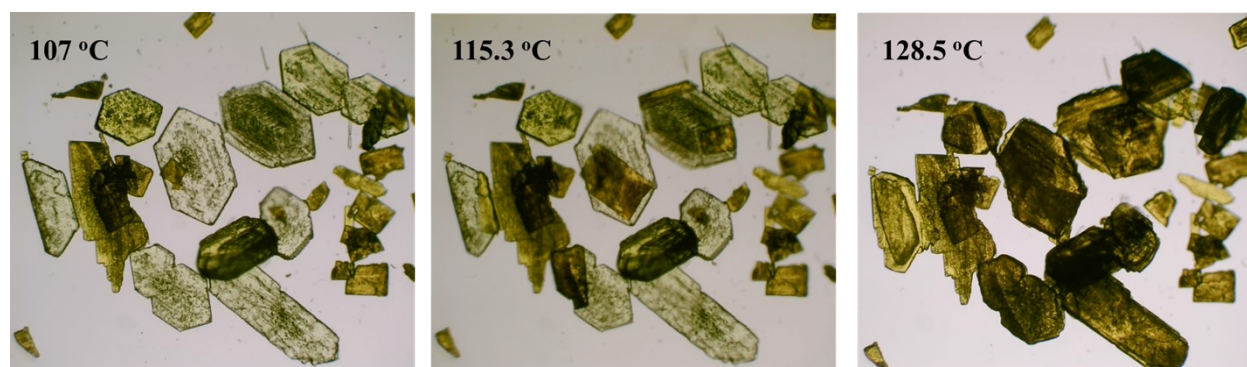

**Figure S7** Snapshots of 4CC crystals morphology changes in solution state at constant temperature.



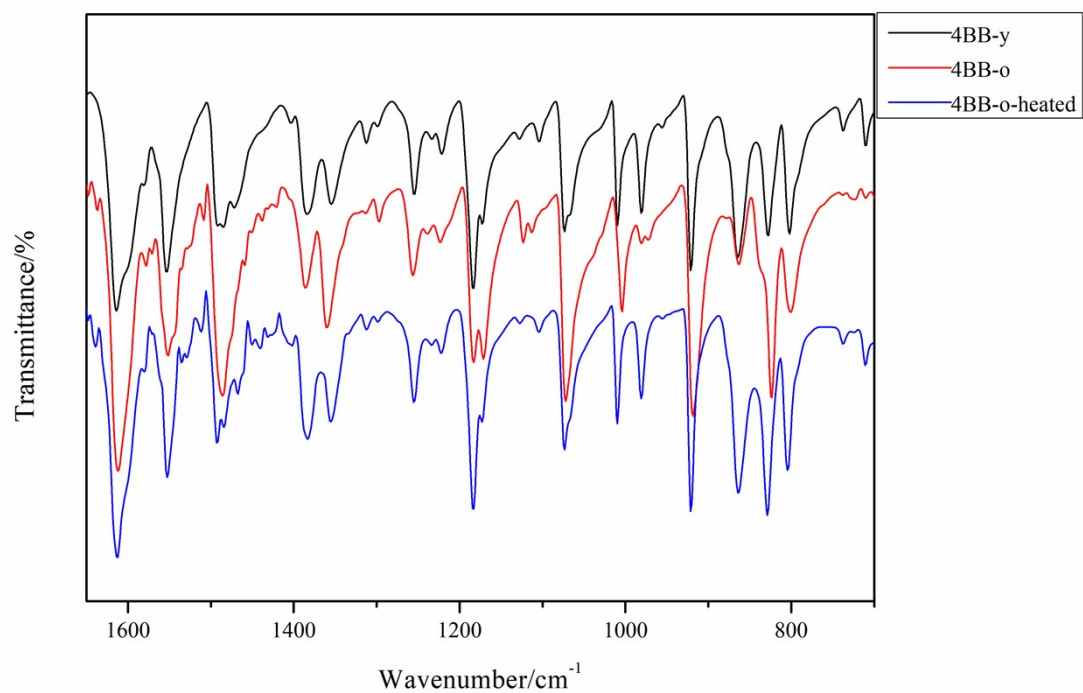

**Figure S8** FT-IR spectra of 4BB-y and 4BB-o with different thermal histories.

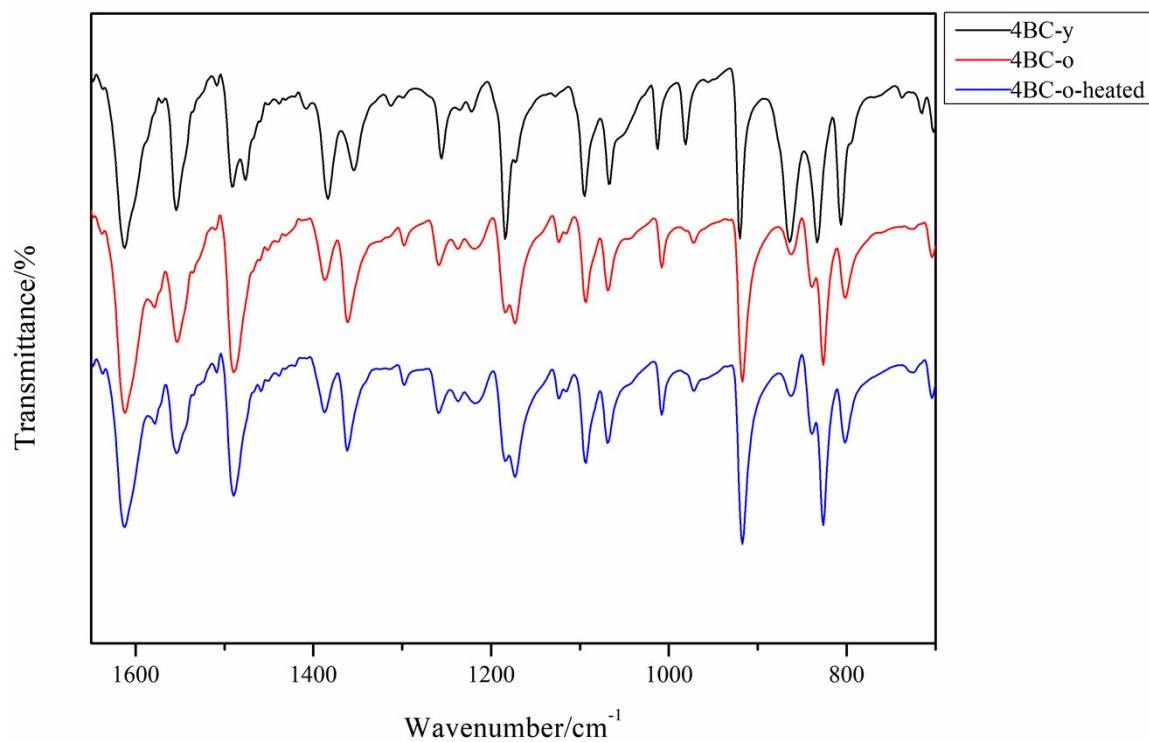

**Figure S9** FT-IR spectra of 4BC-y and 4BC-o with different thermal histories.

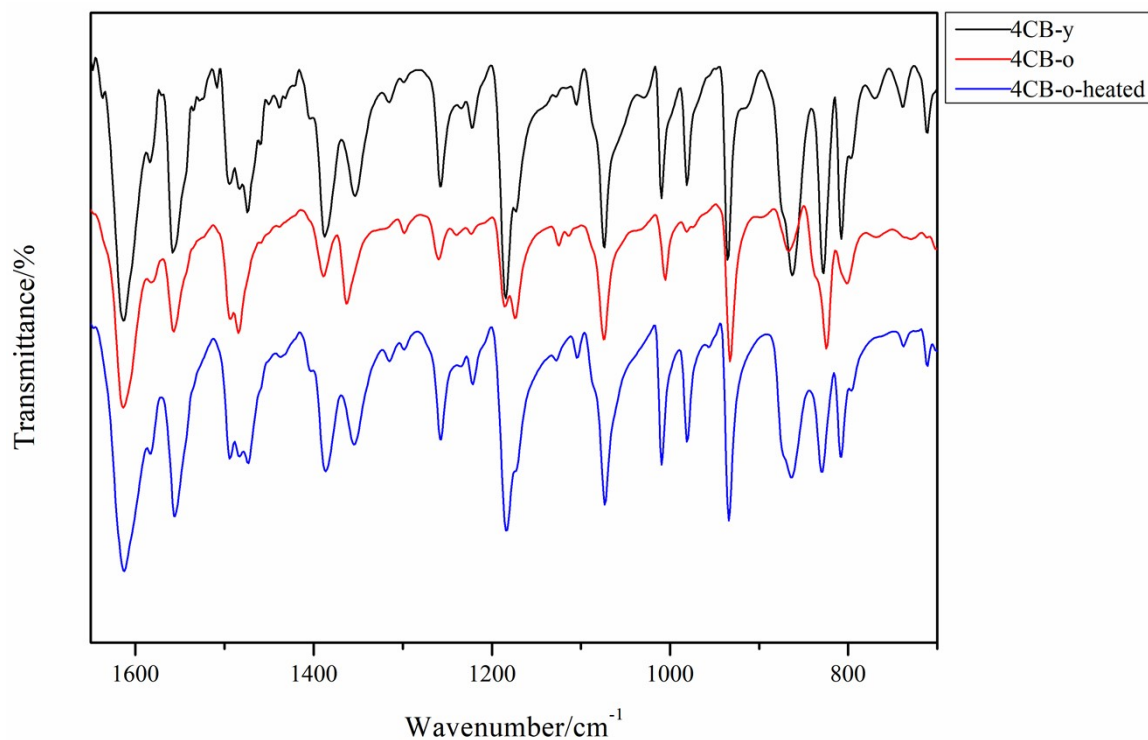

**Figure S10** FT-IR spectra of 4CB-y and 4CB-o with different thermal histories.

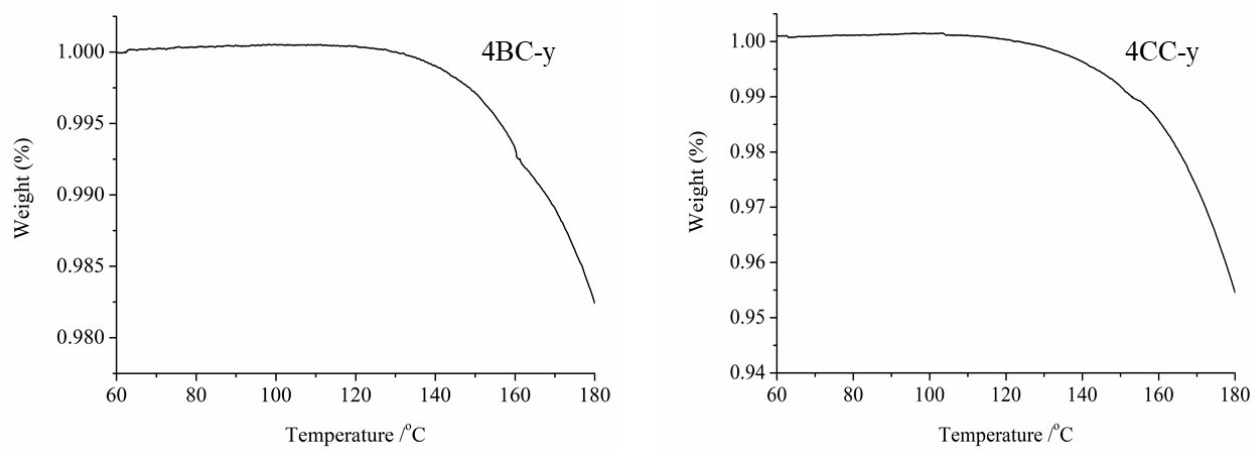

**Figure S11** TG patterns of 4BC-y and 4CC-o.
